# Supplementary material
Source: PubMed Central journal article supplement (PMC3632903)

**Table S1. Pertinent regression parameters of dose-response curves for intracellular and extracellular activity of antibiotics against PAO1 strain <sup>a</sup>.**

| Antibiotic                    | Extracellular activity <sup>c</sup> |                           |                        |         |       | Intracellular activity <sup>a</sup> |                           |                        |         |       |
|-------------------------------|-------------------------------------|---------------------------|------------------------|---------|-------|-------------------------------------|---------------------------|------------------------|---------|-------|
|                               | $E_{min}^d$                         | $E_{max}^d$               | $EC_{50}^e$            | $C_s^f$ | $R^2$ | $E_{min}^d$                         | $E_{max}^d$               | $EC_{50}^e$            | $C_s^f$ | $R^2$ |
| GEN                           | 3.66<br>(3.20 to 4.11)              | >-4.5                     | 0.63<br>(0.47 to 0.84) | 0.46    | 0.98  | 2.76<br>(2.44 to 3.08)              | -1.59<br>(-1.96 to -1.23) | 3.30<br>(2.18 to 4.99) | 5.70    | 0.96  |
| AMK                           | 3.70<br>(3.01 to 4.39)              | >-4.5                     | 1.20<br>(0.79 to 1.82) | 0.69    | 0.94  | 3.78<br>(3.33 to 4.22)              | -2.17<br>(-2.79 to -1.55) | 2.04<br>(1.32 to 3.14) | 3.53    | 0.89  |
| TOB                           | 4.28<br>(2.76 to 5.81)              | >-4.5                     | 0.69<br>(0.42 to 1.14) | 0.55    | 0.90  | 2.99<br>(2.63 to 3.36)              | -1.02<br>(-1.38 to -0.65) | 3.64<br>(2.26 to 5.86) | 10.69   | 0.88  |
| Aminoglycosides <sup>g</sup>  | 3.83<br>(3.37 to 4.28)              | >-4.5                     | 0.74<br>(0.57 to 0.98) | 0.56    | 0.93  | 3.34<br>(3.04 to 3.64)              | -1.31<br>(-1.62 to -1.00) | 2.12<br>(1.51 to 2.98) | 5.40    | 0.84  |
| MXF                           | 4.04<br>(3.21 to 4.87)              | >-4.5                     | 1.97<br>(1.40 to 2.77) | 1.28    | 0.94  | 2.75<br>(2.49 to 3.01)              | -2.87<br>(-3.11 to -2.64) | 1.10<br>(0.85 to 1.42) | 1.05    | 0.98  |
| LVX                           | 3.94<br>(3.00 to 4.88)              | >-4.5                     | 1.82<br>(1.11 to 2.98) | 1.37    | 0.90  | 3.45<br>(2.86 to 4.04)              | -3.22<br>(-3.58 to -2.88) | 0.49<br>(0.30 to 0.79) | 0.48    | 0.95  |
| CIP                           | 4.66<br>(3.49 to 5.82)              | >-4.5                     | 1.09<br>(0.74 to 1.60) | 0.98    | 0.93  | 3.15<br>(2.39 to 3.90)              | -2.66<br>(-3.02 to -2.29) | 2.15<br>(1.22 to 3.77) | 2.55    | 0.92  |
| Fluoroquinolones <sup>g</sup> | 4.10<br>(3.57 to 4.63)              | >-4.5                     | 1.61<br>(1.29 to 2.00) | 1.21    | 0.94  | 3.02<br>(2.65 to 3.39)              | -2.88<br>(-3.13 to -2.63) | 1.00<br>(0.73 to 1.36) | 1.04    | 0.91  |
| TIC                           | 3.24<br>(3.01 to 3.47)              | >-4.5                     | 0.54<br>(0.33 to 0.75) | 1.27    | 0.97  | 2.53<br>(2.33 to 2.73)              | -1.44<br>(-1.71 to -1.17) | 0.59<br>(0.43 to 0.82) | 1.04    | 0.96  |
| PIP                           | 3.87<br>(3.46 to 4.27)              | >-4.5                     | 1.94<br>(1.37 to 2.76) | 1.29    | 0.97  | 2.96<br>(2.64 to 3.28)              | -1.13<br>(-1.41 to -0.85) | 0.26<br>(0.17 to 0.40) | 0.68    | 0.96  |
| TZP                           | 3.69<br>(3.22 to 4.15)              | >-4.5                     | 1.85<br>(1.22 to 2.86) | 1.36    | 0.94  | 2.50<br>(2.27 to 2.74)              | -0.91<br>(-1.22 to -0.61) | 0.56<br>(0.33 to 0.95) | 1.54    | 0.95  |
| FEP                           | 3.97<br>(3.15 to 4.79)              | >-4.5                     | 1.29<br>(0.81 to 2.04) | 0.93    | 0.92  | 3.14<br>(2.62 to 3.66)              | -1.52<br>(-1.93 to -1.11) | 0.75<br>(0.42 to 1.34) | 1.56    | 0.93  |
| CAZ                           | 3.51<br>(3.01 to 4.00)              | >-4.5                     | 1.97<br>(1.40 to 2.78) | 1.45    | 0.96  | 3.13<br>(2.56 to 3.69)              | -1.33<br>(-1.67 to -1.00) | 0.31<br>(0.19 to 0.53) | 0.74    | 0.85  |
| ATM                           | 3.87<br>(3.43 to 4.31)              | -4.36<br>(-5.02 to -3.69) | 1.67<br>(1.18 to 2.36) | 1.48    | 0.92  | 2.92<br>(2.62 to 3.22)              | -0.75<br>(-0.99 to -0.52) | 0.20<br>(0.14 to 0.30) | 0.79    | 0.96  |
| MER                           | 4.62<br>(3.17 to 6.06)              | >-4.5                     | 1.02<br>(0.55 to 1.89) | 0.74    | 0.92  | 2.65<br>(2.17 to 3.13)              | -1.57<br>(-1.80 to -1.34) | 0.36<br>(0.23 to 0.57) | 0.61    | 0.94  |
| IMI                           | 4.23<br>(3.62 to 4.85)              | >-4.5                     | 0.77<br>(0.47 to 1.25) | 0.63    | 0.97  | 2.80<br>(2.42 to 3.19)              | -1.07<br>(-1.33 to -0.81) | 0.74<br>(0.47 to 1.17) | 1.95    | 0.92  |
| DOR                           | 3.51<br>(2.77 to 4.26)              | >-4.5                     | 1.98<br>(1.34 to 2.94) | 1.51    | 0.93  | 2.11<br>(1.72 to 2.51)              | -1.33<br>(-1.60 to -1.08) | 1.21<br>(0.74 to 1.98) | 1.91    | 0.95  |
| $\beta$ -lactams <sup>g</sup> | 3.77<br>(3.57 to 3.98)              | >-4.5                     | 1.58<br>(1.37 to 1.83) | 1.16    | 0.93  | 2.74<br>(2.60 to 2.88)              | -1.23<br>(-1.34 to -1.11) | 0.44<br>(0.36 to 0.53) | 0.98    | 0.90  |
| CST                           | 3.81<br>(2.75 to 4.87)              | >-4.5                     | 1.78<br>(1.08 to 2.95) | 1.25    | 0.92  | 2.84<br>(2.50 to 3.18)              | -1.04<br>(-1.22 to -0.86) | 0.94<br>(0.63 to 1.40) | 2.52    | 0.92  |

<sup>a</sup> Data are based on a 24-h post-phagocytosis exposure. Regression parameters were calculated using all data from antibiotic concentrations of  $10^{-2}$  to  $10^3$  to times the MIC. The parameters described in the table were derived from analysis of the curve shown in Fig 5. See Table S2 and 3 for statistical analyses

<sup>b</sup> Determined in THP-1 macrophages with an initial phagocytosed inoculum of about  $10^6$  CFU/mg of protein.

<sup>d</sup> Log CFU decrease at 24 h from the corresponding original inoculum, as extrapolated for an infinitely large antibiotic concentration. Samples yielding less than  $-5$  log CFU were considered below the detection level.

<sup>e</sup> extracellular concentrations (total drug; in multiples of the MIC) causing a reduction of the inoculum halfway between the initial ( $E_0$ ) and the maximal ( $E_{max}$ ) values, as obtained from the Hill equation.

<sup>f</sup> Static concentration, i.e., the extracellular concentration (total drug; in multiples of the MIC) resulting in no apparent bacterial growth (number of CFU identical to the initial inoculum), as calculated from the Hill equation of the concentration-response curve.

<sup>g</sup> reproduced from Table 2; data from all antibiotics within the class were used to fit a single curve

**Table S2: statistical analyses of EC<sub>50</sub> presented in Table S1**

Black and dark gray cells compare parameters for extracellular and intracellular activity of individual antibiotics (black) or classes as a whole (dark grey) (\*\*\*,  $p < 0.01$ ; NS, not significant).

Colored cells compare antibiotics within a same class (orange: aminoglycosides; green:  $\beta$ -lactams; blue: fluoroquinolones) or classes as whole among them (yellow). Light and dark colors correspond to statistical analysis for extracellular and intracellular activities, respectively (\*:  $p < 0.05$ ; NS: not significant).

| EC <sub>50</sub> |       | Antibiotics |     |     |     |       |     |     |     |     |     |     |     |     |     |    |     |     |     |     |
|------------------|-------|-------------|-----|-----|-----|-------|-----|-----|-----|-----|-----|-----|-----|-----|-----|----|-----|-----|-----|-----|
|                  |       | AMIN.       | GEN | AMK | TOB | Blact | TIC | PIP | TZP | FEP | CAZ | ATM | MEM | IMI | DOR | FQ | LVX | MOX | CIP | CST |
| Antibiotics      | AMIN. | ***         | NS  | NS  | *   | *     |     |     |     |     |     |     |     |     |     | *  |     |     |     | *   |
|                  | GEN   | NS          | *** | NS  | NS  |       |     |     |     |     |     |     |     |     |     |    |     |     |     |     |
|                  | AMK   | NS          | *   | NS  | NS  |       |     |     |     |     |     |     |     |     |     |    |     |     |     |     |
|                  | TOB   | NS          | NS  | *   | *** |       |     |     |     |     |     |     |     |     |     |    |     |     |     |     |
|                  | Blact | NS          |     |     |     | NS    | NS  | NS  | NS  | NS  | NS  | NS  | NS  | NS  | NS  | NS |     |     |     | NS  |
|                  | TIC   |             |     |     |     | NS    | NS  | NS  | NS  | NS  | NS  | NS  | NS  | NS  | NS  |    |     |     |     |     |
|                  | PIP   |             |     |     |     | NS    | NS  | NS  | NS  | NS  | NS  | NS  | NS  | NS  | NS  |    |     |     |     |     |
|                  | TZP   |             |     |     |     | NS    | NS  | NS  | NS  | NS  | NS  | NS  | NS  | NS  | NS  |    |     |     |     |     |
|                  | FEP   |             |     |     |     | NS    | NS  | NS  | NS  | NS  | NS  | NS  | NS  | NS  | NS  |    |     |     |     |     |
|                  | CAZ   |             |     |     |     | NS    | NS  | NS  | NS  | NS  | NS  | NS  | NS  | NS  | NS  |    |     |     |     |     |
|                  | ATM   |             |     |     |     | NS    | NS  | NS  | NS  | NS  | NS  | NS  | NS  | NS  | NS  |    |     |     |     |     |
|                  | MEM   |             |     |     |     | NS    | NS  | NS  | NS  | NS  | NS  | NS  | NS  | NS  | NS  |    |     |     |     |     |
|                  | IMI   |             |     |     |     | NS    | NS  | NS  | NS  | NS  | NS  | NS  | NS  | NS  | NS  |    |     |     |     |     |
|                  | DOR   |             |     |     |     | NS    | NS  | NS  | NS  | NS  | NS  | NS  | NS  | NS  | NS  |    |     |     |     |     |
|                  | FQ    | NS          |     |     |     | NS    |     |     |     |     |     |     |     |     |     | NS | NS  | NS  | NS  | NS  |
|                  | LVX   |             |     |     |     |       |     |     |     |     |     |     |     |     |     | NS | NS  | NS  | NS  |     |
|                  | MOX   |             |     |     |     |       |     |     |     |     |     |     |     |     |     | NS | NS  | NS  | NS  |     |
|                  | CIP   |             |     |     |     |       |     |     |     |     |     |     |     |     |     | NS | NS  | NS  | NS  |     |
|                  | CST   | NS          |     |     |     | NS    |     |     |     |     |     |     |     |     |     | NS |     |     |     | NS  |

**Table S3: statistical analyses of E<sub>max</sub> presented in Table S1**

Black and dark gray cells compare parameters for extracellular and intracellular activity of individual antibiotics (black) or classes as a whole (dark grey) (\*\*\*, p< 0.01; NS, not significant).

Colored cells compare antibiotics within a same class (orange: aminoglycosides; green: β-lactams; blue: fluoroquinolones) or classes as whole among them (yellow). Light and dark colors correspond to statistical analysis for extracellular and intracellular activities, respectively (\*: p<0.05; NS: not significant; NA: not applicable [because E<sub>max</sub> > detection limit]).

| E <sub>max</sub> |       | Antibiotics |     |     |     |       |     |     |     |     |     |     |     |     |     |     |     |     |     |     |
|------------------|-------|-------------|-----|-----|-----|-------|-----|-----|-----|-----|-----|-----|-----|-----|-----|-----|-----|-----|-----|-----|
|                  |       | AMIN.       | GEN | AMK | TOB | Blact | TIC | PIP | TZP | FEP | CAZ | ATM | MEM | IMI | DOR | FQ  | LVX | MOX | CIP | CST |
| Antibiotics      | AMIN. | ***         | NS  | *   | NS  | NS    |     |     |     |     |     |     |     |     |     | *   |     |     |     | NS  |
|                  | GEN   | NA          | *** | NS  | *   |       |     |     |     |     |     |     |     |     |     |     |     |     |     |     |
|                  | AMK   | NA          | NA  | *** | NS  |       |     |     |     |     |     |     |     |     |     |     |     |     |     |     |
|                  | TOB   | NA          | NA  | NA  | *** |       |     |     |     |     |     |     |     |     |     |     |     |     |     |     |
|                  | Blact | NA          |     |     |     | ***   | NS  | NS  | NS  | NS  | NS  | *   | NS  | NS  | NS  | *   |     |     |     | NS  |
|                  | TIC   |             |     |     |     | NA    | *** | NS  | *   | NS  | NS  | *   | NS  | NS  | NS  |     |     |     |     |     |
|                  | PIP   |             |     |     |     | NA    | NA  | *** | NS  | NS  | NS  | *   | NS  | NS  |     |     |     |     |     |     |
|                  | TZP   |             |     |     |     | NA    | NA  | NA  | *** | *   | *   | NS  | *   | NS  | *   |     |     |     |     |     |
|                  | FEP   |             |     |     |     | NA    | NA  | NA  | NA  | *** | NS  | *   | NS  | *   | NS  |     |     |     |     |     |
|                  | CAZ   |             |     |     |     | NA    | NA  | NA  | NA  | NA  | *** | *   | NS  | NS  | NS  |     |     |     |     |     |
|                  | ATM   |             |     |     |     | NA    | NA  | NA  | NA  | NA  | NA  | *** | *   | NS  | *   |     |     |     |     |     |
|                  | MEM   |             |     |     |     | NA    | NA  | NA  | NA  | NA  | NA  | NA  | *** | NS  | NS  |     |     |     |     |     |
|                  | IMI   |             |     |     |     | NA    | NA  | NA  | NA  | NA  | NA  | NA  | NA  | *** | NS  |     |     |     |     |     |
|                  | DOR   |             |     |     |     | NA    | NA  | NA  | NA  | NA  | NA  | NA  | NA  | NA  | *** |     |     |     |     |     |
|                  | FQ    | NA          |     |     |     | NA    |     |     |     |     |     |     |     |     |     | *** | NS  | NS  | NS  | *   |
|                  | LVX   |             |     |     |     |       |     |     |     |     |     |     |     |     |     | NA  | *** | NS  | *   |     |
|                  | MOX   |             |     |     |     |       |     |     |     |     |     |     |     |     |     | NA  | NA  | *** | NS  |     |
|                  | CIP   |             |     |     |     |       |     |     |     |     |     |     |     |     |     | NA  | NA  | NA  | *** |     |
|                  | CST   | NA          |     |     |     | NA    |     |     |     |     |     |     |     |     |     | NA  |     |     |     | *** |

**Figure S1.** Influence of the time on the rate and extent of activity of antibiotics against extracellular and intracellular *P. aeruginosa* PAO1 upon incubation at a fixed extracellular concentration corresponding to their MIC in broth (open symbols and dotted lines) and to their maximal concentration (total drug) observed in humans after administration of conventional doses ( $C_{max}$ ; closed symbols and plain lines). The ordinate shows the change in the number of CFU (log scale) per mL for extracellular bacteria or per mg of cell protein for intracellular bacteria. The plain horizontal line corresponds to a bacteriostatic effect (no change from initial inoculum) and the dotted horizontal line shows the limit of detection ( $-4.5 \log_{10}$  CFU decrease). Values are means  $\pm$  standard deviations ( $n = 3$ ); when not visible, error bars are smaller than the symbols.

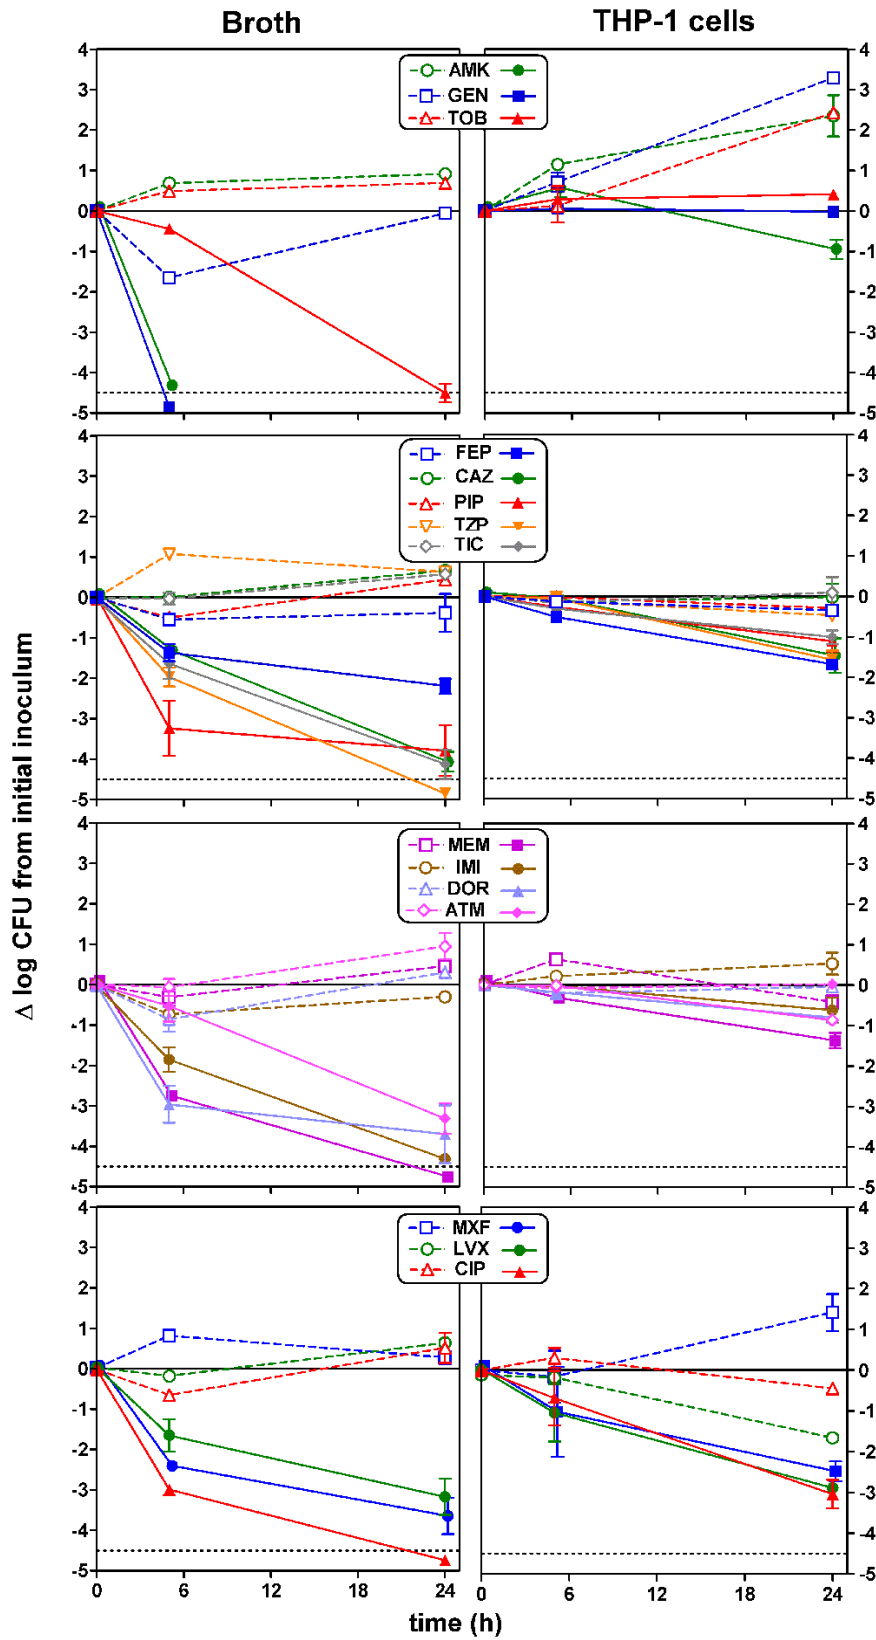

Supplement: AAC.02609-12_zac999101811so1.pdf [file AAC.02609-12_zac999101811so1.pdf]
